# Supplementary material
Source: HighWire-hosted journal article supplement (https://www.annfammed.org/highwire/filestream/7598/field_highwire_adjunct_files/0/shapiroapp1.pdf)
Supplement: shapiroapp1.pdf [file shapiroapp1.pdf]

Nygren P, Nelson HD, Klein J. Screening children for family violence: a review of the evidence for the US Preventive Services Task Force. *Ann Fam Med.* 2004;2:161-169.

<http://www.annfammed.org/cgi/content/full/2/2/161/DC1>

## Appendix 1. Search Strategies

### Child Abuse Screening Instruments

Databases: MEDLINE (1996-2002), CINAHL (1982-2002),

Health & Psychosocial Instruments (1985-2002)

- 1 exp Child Abuse/ or child abuse.mp.
- 2 (battered child\$ or abused child\$.mp.
- 3 violence against child\$.mp.
- 4 school based.mp.
- 5 SCHOOLS, NURSERY/
- 6 (elementary school\$1 or grade school\$.mp.
- 7 4 or 5 or 6
- 8 7 and abuse\$.mp
- 9 1 or 2 or 3 or 8
- 10 Mass Screening/ or screening.mp.
- 11 questionnaires/ or questionnaire\$.tw.
- interviews/ or interview\$.tw.
- 13 10 or 11 or 12
- 14 9 and 13
- 15 limit 14 to (human and English language)

### Child Abuse Interventions

Databases: MEDLINE (1996-2002), CINAHL (1982-2002)

- 1 exp Child Abuse/ or child abuse.mp.
- 2 (battered child\$ or abused child\$.mp.
- 3 violence against child\$.mp.
- 4 school based.mp.
- 5 SCHOOLS, NURSERY/
- 6 (elementary school\$1 or grade school\$.mp.
- 7 4 or 5 or 6
- 8 7 and abuse\$.mp.
- 9 1 or 2 or 3 or 8
- 10 PEDIATRICS/ or pediatrics.mp.
- 11 pediatrician\$.mp.
- 12 Physicians, Family/ or family physicians.mp.
- 13 exp Primary Health Care/ or primary care.mp.
- 14 Family Practice/ or family practice.mp.
- 15 emergencies/ or emergency.mp.
- 16 exp emergency service, hospital/ or emergency department\$.mp.
- 17 10 or 11 or 12 or 13 or 14 or 15 or 16
- 18 9 and 17
- 19 pc.fs. or prevent\$.mp. or intervention.mp. or assessment.mp.
- 20 exp counseling/ or counsel\$.mp.
- 21 (patient education or questionnaire\$.mp.
- 22 questionnaires/
- 23 interviews/ or interview\$.mp.

- 24 exp clinical trials/ or clinical trial\$.mp.
- 25 19 or 20 or 21 or 22 or 23 or 24
- 26 18 and 25
- 27 limit 26 to (human and English language)
- 28 from 27 keep 1-104

Database: PsycINFO (1984-2002)

- 1 exp Child Abuse/ or child abuse.mp.
- 2 (battered child\$ or abused child\$.mp.
- 3 violence against child\$.mp.
- 4 (school based and (violence or abuse\$)).mp.
- 5 exp Nursery Schools/ or nursery school.mp.
- 6 exp Elementary Schools/ or elementary school.mp.
- 7 grade school\$.mp.
- 8 (5 or 6 or 7) and (abuse or violence).mp.
- 9 1 or 2 or 3 or 4 or 8
- 10 exp PEDIATRICS/ or pediatrics.mp.
- 11 exp Family Physicians/ or family physicians.mp.
- 12 exp Primary Health Care/ or exp Physicians/ or primary care.mp.
- 13 exp Family Physicians/ or family practice.mp.
- 14 exp emergency services/ or emergency\$.mp.
- 15 exp School Nurses/ or school nurse.mp.
- 16 10 or 11 or 12 or 13 or 14 or 15
- 17 9 and 16
- 18 limit 17 to (human and english language)
- 19 prevention/ or prevent\$.mp. or intervention.mp. or assessment.mp.
- 20 exp counseling/ or counsel\$.mp.
- 21 exp Client Education/ or patient education.mp.
- 22 questionnaires/ or questionnaire\$.mp.
- 23 exp INTERVIEWS/ or interviews.mp.
- 24 clinical trial\$.mp.
- 25 exp At Risk Populations/ or exp Cohort Analysis/ or cohort study.mp.
- 26 19 or 20 or 21 or 22 or 23 or 24 or 25
- 27 18 and 26

Database: ERIC (1989-2002)

- 1 Child Abuse
- 2 Family Practice
- 3 Physicians
- 4 1 and 2 or 3

Database: Cochrane Database of Systematic Reviews & Controlled Trials  
 Key word search: **child abuse**
